# Supplementary material for: Survey of the Heritability and Sparse Architecture of Gene Expression Traits across Human Tissues
Source: PubMed Central journal article supplement (PMC5106030; doi:10.1371/journal.pgen.1006423), 2016-11-11
Supplement: pgen.1006423.s013.pdf [file pgen.1006423.s013.pdf]

**S1 Table. Estimates of cross-tissue and tissue-specific local  $h^2$ .** Expression levels derived by Orthogonal Tissue Decomposition and  $h^2$  estimated using the `--reml-no-constrain` method.

| tissue                                    | n   | mean $h^2$ | % FDR<0.1 | num FDR<0.1 | num expressed |
|-------------------------------------------|-----|------------|-----------|-------------|---------------|
| Cross-tissue                              | 450 | 0.062      | 20.2      | 2995        | 14861         |
| Adipose - Subcutaneous                    | 298 | 0.017      | 9.5       | 1408        | 14861         |
| Adrenal Gland                             | 126 | 0.037      | 8.9       | 1329        | 14861         |
| Artery - Aorta                            | 198 | 0.022      | 9.8       | 1449        | 14861         |
| Artery - Coronary                         | 119 | 0.048      | 8.1       | 1211        | 14861         |
| Artery - Tibial                           | 285 | 0.022      | 8.5       | 1262        | 14861         |
| Brain - Anterior cingulate cortex (BA24)  | 72  | 0.037      | 10.9      | 1627        | 14861         |
| Brain - Caudate (basal ganglia)           | 100 | 0.042      | 9.3       | 1388        | 14861         |
| Brain - Cerebellar Hemisphere             | 89  | 0.046      | 10.9      | 1627        | 14861         |
| Brain - Cerebellum                        | 103 | 0.041      | 10.9      | 1618        | 14861         |
| Brain - Cortex                            | 96  | 0.053      | 10.0      | 1480        | 14861         |
| Brain - Frontal Cortex (BA9)              | 92  | 0.037      | 10.6      | 1569        | 14861         |
| Brain - Hippocampus                       | 81  | 0.033      | 10.9      | 1618        | 14861         |
| Brain - Hypothalamus                      | 81  | 0.020      | 12.4      | 1839        | 14861         |
| Brain - Nucleus accumbens (basal ganglia) | 93  | 0.040      | 10.7      | 1585        | 14861         |
| Brain - Putamen (basal ganglia)           | 82  | 0.033      | 10.6      | 1581        | 14861         |
| Breast - Mammary Tissue                   | 183 | 0.020      | 9.2       | 1367        | 14861         |
| Cells - EBV-transformed lymphocytes       | 115 | 0.045      | 8.9       | 1323        | 14861         |
| Cells - Transformed fibroblasts           | 272 | 0.019      | 9.0       | 1334        | 14861         |
| Colon - Sigmoid                           | 124 | 0.024      | 10.6      | 1578        | 14861         |
| Colon - Transverse                        | 170 | 0.022      | 10.6      | 1573        | 14861         |
| Esophagus - Gastroesophageal Junction     | 127 | 0.029      | 9.1       | 1358        | 14861         |
| Esophagus - Mucosa                        | 242 | 0.026      | 8.2       | 1220        | 14861         |
| Esophagus - Muscularis                    | 219 | 0.024      | 9.0       | 1344        | 14861         |
| Heart - Atrial Appendage                  | 159 | 0.031      | 9.7       | 1437        | 14861         |
| Heart - Left Ventricle                    | 190 | 0.025      | 8.9       | 1325        | 14861         |
| Liver                                     | 98  | 0.036      | 10.2      | 1519        | 14861         |
| Lung                                      | 279 | 0.018      | 8.8       | 1308        | 14861         |
| Muscle - Skeletal                         | 361 | 0.020      | 9.0       | 1342        | 14861         |
| Nerve - Tibial                            | 256 | 0.026      | 8.3       | 1235        | 14861         |
| Ovary                                     | 85  | 0.043      | 10.2      | 1523        | 14861         |
| Pancreas                                  | 150 | 0.036      | 9.4       | 1396        | 14861         |
| Pituitary                                 | 87  | 0.044      | 10.0      | 1481        | 14861         |
| Skin - Not Sun Exposed (Suprapubic)       | 196 | 0.041      | 6.3       | 938         | 14861         |
| Skin - Sun Exposed (Lower leg)            | 303 | 0.027      | 6.9       | 1020        | 14861         |
| Small Intestine - Terminal Ileum          | 77  | 0.046      | 11.7      | 1733        | 14861         |
| Spleen                                    | 89  | 0.062      | 9.7       | 1448        | 14861         |
| Stomach                                   | 171 | 0.020      | 10.3      | 1532        | 14861         |
| Testis                                    | 157 | 0.042      | 10.5      | 1561        | 14861         |
| Thyroid                                   | 279 | 0.024      | 8.7       | 1293        | 14861         |
| Whole Blood                               | 339 | 0.025      | 7.7       | 1150        | 14861         |

All tissues are from the GTEx Project. Mean heritability ( $h^2$ ) is calculated across genes for each tissue. The percentage (%) and number (num) of genes with significant  $h^2$  estimates (FDR < 0.1) in each tissue are reported.
